# Supplementary material for: Caspofungin-Induced Cardiotoxicity in Patients Treating for Candidemia
Source: Preprints.org preprint supplement (doi:10.20944/preprints202207.0381.v1), 2022-07-26
Supplement: Supplementary file 2 [file supplementary]

| **Table S1:** Frequency of the patients in the study subgroups | | | |
| --- | --- | --- | --- |
|  |  | **N** | **%** |
| Gender | Female | 5 | 33 |
| Male | 10 | 67 |
| Drug infusion | Peripheral | 9 | 60 |
| Central | 6 | 40 |
| DM | Diabetic | 1 | 6.7 |
| Nondiabetic | 14 | 93 |
| HTN | Hypertensive | 1 | 6.7 |
| Non-hypertensive | 14 | 93 |
| Chronic kidney disease | Non-CKD | 15 | 100 |
| Atrial fibrillation | Non-AF | 15 | 100 |
| AF, Atrial fibrillation; CKD, Chronic kidney disease; DM, Diabetes mellitus; HTN, Hypertension | | | |

| Table S2. Paired Samples Correlation and the coefficient of determination (before and after caspofungin injection) | | | | | |
| --- | --- | --- | --- | --- | --- |
|  |  | **N** | **Correlation** | **p-value** | **r2** |
| Pair 1 | Simpson LVEF 1&2 | 15 | 0.05 | 0.8 |  |
| Pair 2 | GLS 1&2 | 15 | 0.41 | 0.12 |  |
| Pair 3 | Tei index 1&2 | 15 | 0.29 | 0.27 |  |
| Pair 4 | LAVI 1&2 | 15 | 0.56 | 0.02 | 0.31 |
| Pair 5 | hs-cTnI 1&2 | 15 | 0.92 | 0 | 0.85 |
| LVEF, left ventricular ejection fraction; GLS, global longitudinal strain; LAVI, Left atrial volume index; hs-cTnI, high-sensitivity cardiac troponin I | | | | | |
